# Supplementary material
Source: MDPI journal article supplement (https://www.mdpi.com/2071-1050/13/4/2254)

## How to download and run the Priority Estimation Tool (PriEsT)?

In order to use the PriEsT we need to have Java on our computer. If Java is already installed, we can skip Step 1.

### Step 1: Installing Java

Java can be downloaded on the following link:

<https://java.com/en/download/>

Click to the “Agree and Start Free Download” button as shown below:

#### Download Java for Windows

**Recommended Version 8 Update 261 (filesize: 1.99 MB)**

Release date July 14, 2020

 **Important Oracle Java License Update**  
**The Oracle Java License has changed for releases starting April 16, 2019.**  
The new [Oracle Technology Network License Agreement for Oracle Java SE](#) is substantially different from prior Oracle Java licenses. The new license permits certain uses, such as personal use and development use, at no cost -- but other uses authorized under prior Oracle Java licenses may no longer be available. Please review the terms carefully before downloading and using this product. An FAQ is available [here](#).  
  
Commercial license and support is available with a low cost [Java SE Subscription](#).  
  
Oracle also provides the latest OpenJDK release under the open source [GPL License](#) at [jdk.java.net](#).

**Agree and Start Free Download**

After that a file called JavaSetup will be downloaded to our computer (the name of the file contains the number of the current version of Java as well). We should run this program and then click to the “Install” button as it can be seen on the following figure:

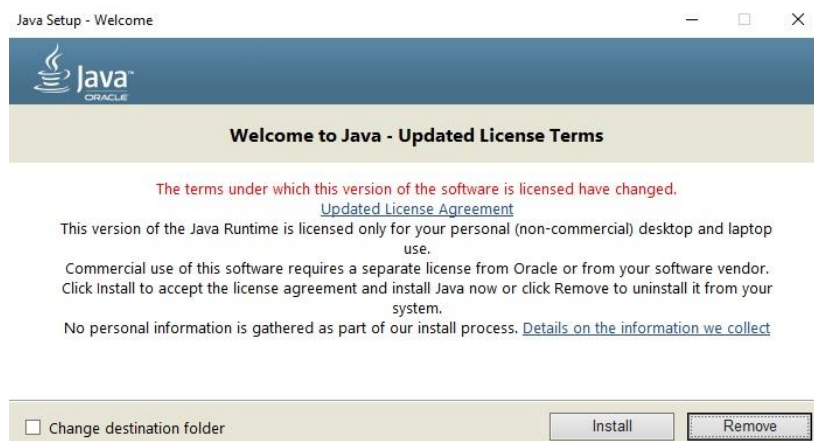

Now we have an installed Java software on our computer.

## Step 2: Downloading the PriEsT

PriEsT can be downloaded on the following link:

<https://sourceforge.net/projects/priority/>

Click to the “Download” button as shown below:

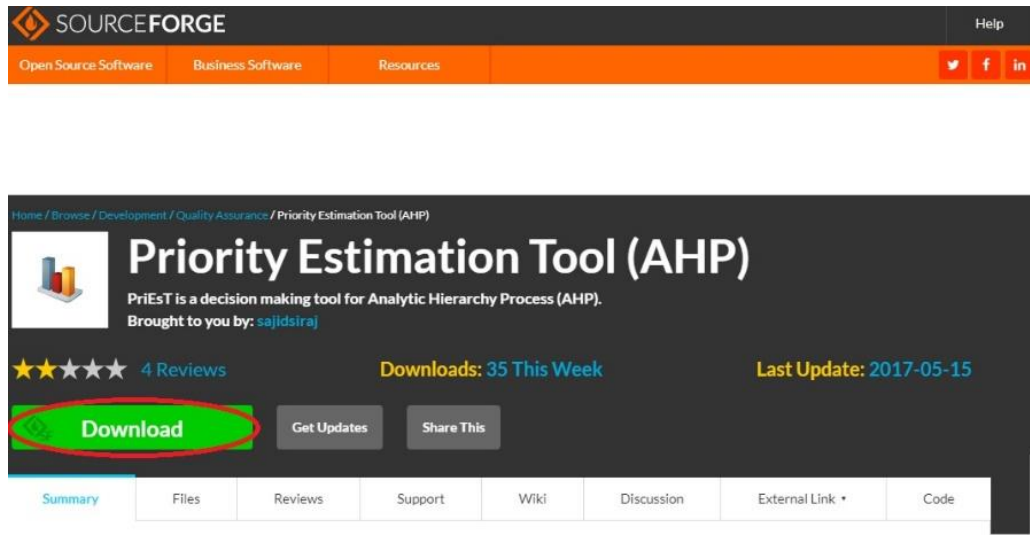

We should unzip the downloaded file called „PriEsT-allinone-v2.1” and then we can easily use the “**PriEsTMobile\_Desktop**” file without any further installation. This is the PriEsT software, and one can open other PriEsT files with the help of the “Import” button as it can be seen on the following picture:

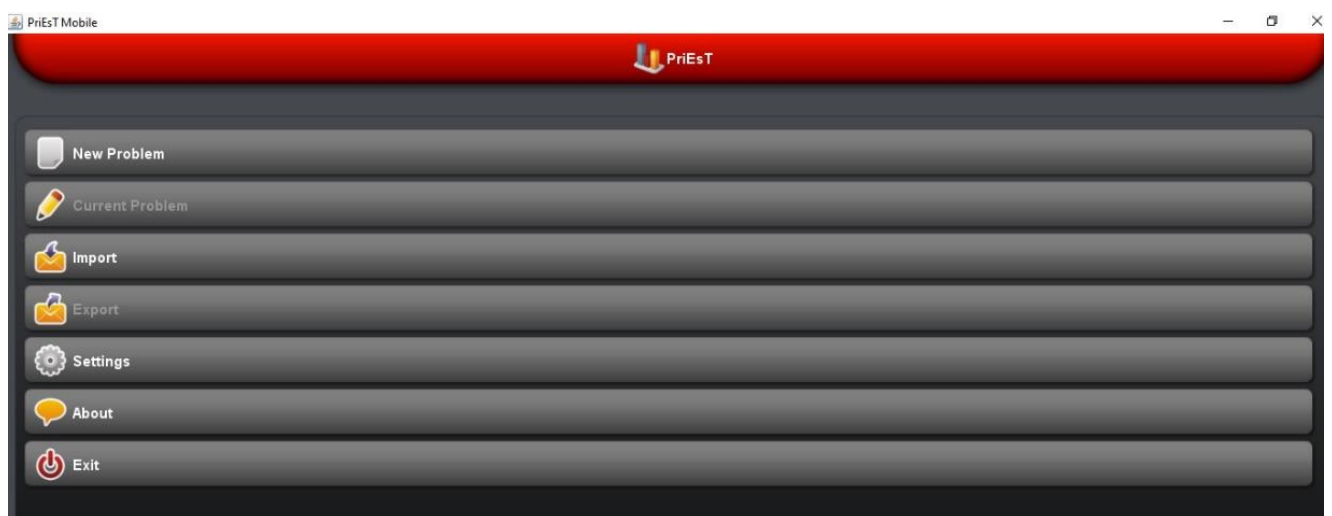

Supplement: s1 [file s1]
